# Supplementary material for: Using a robotic fish to investigate individual differences in social responsiveness in the guppy
Source: PubMed Central journal article supplement (PMC6124066; doi:10.1098/rsos.181026), 2018-08-08
Supplement: rsos181026supp2.pdf [file rsos181026supp2.pdf]

1 **Electronic Supplemental Material S2**

2 **Using a robotic fish to investigate individual differences in social**  
3 **responsiveness in the guppy (S2)**

4 David Bierbach<sup>\*</sup>, Tim Landgraf<sup>\*</sup>, Pawel Romanczuk, Juliane Lukas, Hai Nguyen, Max Wolf,  
5 Jens Krause

6

7

8 *\* Authors contributed equally*

9

10 **Calculation of average time-delayed cross-correlation (TLXC)**

11

12 We calculated the time-delayed normalized cross correlation function for different values of  
13 the lagtime  $\tau$ :  $C(\tau) = \langle v(t)v_f(t+\tau) \rangle_t$  with  $v_f$  being the velocity of the focal individual and  $\langle \dots \rangle_t$   
14 indicating a time average over all points where  $v(t)v_f(t+\tau)$  is defined. As the cross correlation,  
15 requires the shifting of the velocity vector of the focal individual by  $k$  points, with  $\tau = k\Delta t$  ( $\Delta t$ :  
16 time difference between two time frames), the time average for different  $\tau$  (different  $k$ ) has to  
17 be taken over  $k_{avg} = \lfloor (T - \tau) / \Delta t \rfloor$  points where  $v(t)v_f(t+\tau)$  is defined. Here  $T$  is the total  
18 trajectory duration used in experiments  $T = 120s$ . For example for  $\tau = 3s$  and  $\Delta t = 0.111$ , we  
19 obtain  $k_{avg} = 1053$ . Eventually, we calculated **TLXC** as the average  $C(\tau)$  over a finite range of  
20 timelags ( $\tau = 0 - 6s$ ): **TLXC** =  $\langle C(\tau) \rangle$ .
